# Supplementary material for: Rescuing ocular development in an anophthalmic pig by blastocyst complementation
Source: PubMed Central journal article supplement (PMC6284517; doi:10.15252/emmm.201808861), 2018-11-16
Supplement: EMMM-10-e8861-s001.pdf [file EMMM-10-e8861-s001.pdf]

# **Rescuing ocular development in an anophthalmic pig by blastocyst complementation**

Hongyong Zhang, Jiaojiao Huang, Zechen Li, Guosong Qin, Nan Zhang, Tang Hai, Qianlong Hong, Qiantao Zheng, Ying Zhang, Ruigao Song, Jing Yao, Chunwei Cao, Jianguo Zhao and Qi Zhou

## **Appendix**

Appendix Table S1

Appendix Table S2

Appendix Table S3

Appendix Table S1. Summary of primer sequence information used for PCR and quantitative RT-PCR.

| <b>Gene</b>                    | <b>Primer sequence (5'-3')</b>                           | <b>Product size (bp)</b> |
|--------------------------------|----------------------------------------------------------|--------------------------|
| <b><i>MITF</i></b>             | F:TCCCTCTCAAGGTGCTCGTC<br>R: CACCACCACCAGCGATTGTA        | 471                      |
| <b><i>MITF-B</i></b>           | F:CTCAAGGTGCTCGTCCAGAT<br>R:GGCAGTAACATGTGTCACC          | 418                      |
| <b><i>GFP</i></b>              | F:CACAAGTTCAGCGTGTCCG<br>R:CTCGATGCGGTTACCAG             | 300                      |
| <b><i>MITF-qPCR</i></b>        | F:CCAGACATGCGCTGGAACAA<br>R:CAAATGCCGATTGGCGTGC          | 135                      |
| <b><i>KIT</i></b>              | F:TAAGTGAAAGAAGTCAATCTGAG<br>R:GGCAGTCATGTAACATCACC      | 152                      |
| <b><i>ZO-1</i></b>             | F:CCCGATTCTAAGCAGGGTG<br>R:CCCATAACCACTGGTTCTGCT         | 212                      |
| <b><i>RPE65</i></b>            | F:CACCTGTTTGATGGGCAAGC<br>R:GCCCGTACGTAAGCATCAGT         | 101                      |
| <b><i>Bestrophin</i></b>       | F:GCTCATGCGCTATGCCAAC<br>R:GATTCGACCCCAATCCAGG           | 223                      |
| <b><i>PAX6</i></b>             | F:CAACCTGGCTAGCGAAAAGC<br>R:GCTGGCAGCCATCTTGAGTA         | 152                      |
| <b><i>PEDF</i></b>             | F:AGAGAGCCTCACCTCTGAGT<br>R:CCTGCACAGACTTCGTGAGTT        | 122                      |
| <b>human <i>ZO-1</i></b>       | F:CAGCCAGCCTGCTAAACCTA<br>R:GCCATCTCTTGCTGCCAAAC         | 130                      |
| <b>human <i>RPE65</i></b>      | F:CATGGAGTCTTTGGGGAGCC<br>R:TTCCAGCAGCAGAGATCCAC         | 196                      |
| <b>human <i>Bestrophin</i></b> | F:TCAGCACCGCAGTCTACAAG<br>R:TCTGGAGCAGGATAGGGTCC         | 198                      |
| <b>human <i>PAX6</i></b>       | F:CAACCTGGCTAGCGAAAAGC<br>R:GCTGGCAGCCATCTTGAGTA         | 286                      |
| <b>human <i>PEDF</i></b>       | F:TATCACCTTAACCAGCCTTTCATC<br>R:GGGTCCAGAATCTTGCCAATG    | 82                       |
| <b><i>GAPDH</i></b>            | F:GCAAAGTGGACATTGTCGCCATCA<br>R:AGCTTCCCATTCTCAGCCTTGACT | 124                      |

Appendix Table S2. Production efficiency of E44 chimeric fetuses by complementation of the embryos derived from the *MITF*<sup>L247S/L247S</sup> cell line with the blastomeres derived from the LW cell line.

| Host cell line                                | Donor cell line | No. of embryos | No. of recipients | Pregnant recipients (%) | No. of E44 fetuses | No. of E44 chimeric fetuses (%) |
|-----------------------------------------------|-----------------|----------------|-------------------|-------------------------|--------------------|---------------------------------|
| <i>MITF</i> <sup>L247S/L247S</sup> fibroblast | LW Fibroblast   | 3754           | 16                | 3 (18.75)               | 4                  | 1 (25%)                         |

Appendix Table S3. Production efficiency of full-term chimeric piglets by complementation of the embryos derived from the *MITF*<sup>L247S/L247S</sup> cell line with the blastomeres derived from the Bama GFP-labeled cell line.

| Host cell line                                | Donor cell line        | No. of embryos | No. of recipients | Pregnant recipients (%) | No. of piglets | No. of chimeric piglets (%) |
|-----------------------------------------------|------------------------|----------------|-------------------|-------------------------|----------------|-----------------------------|
| <i>MITF</i> <sup>L247S/L247S</sup> fibroblast | GFP-labeled Fibroblast | 1671           | 7                 | 3 (42.86)               | 7              | 1 (14.29%)                  |
