# Supplementary material for: Rescuing ocular development in an anophthalmic pig by blastocyst complementation
Source: PubMed Central journal article supplement (PMC6284517; doi:10.15252/emmm.201808861), 2018-11-16
Supplement: EMMM-10-e8861-s002.pdf [file EMMM-10-e8861-s002.pdf]

## Expanded View Figures

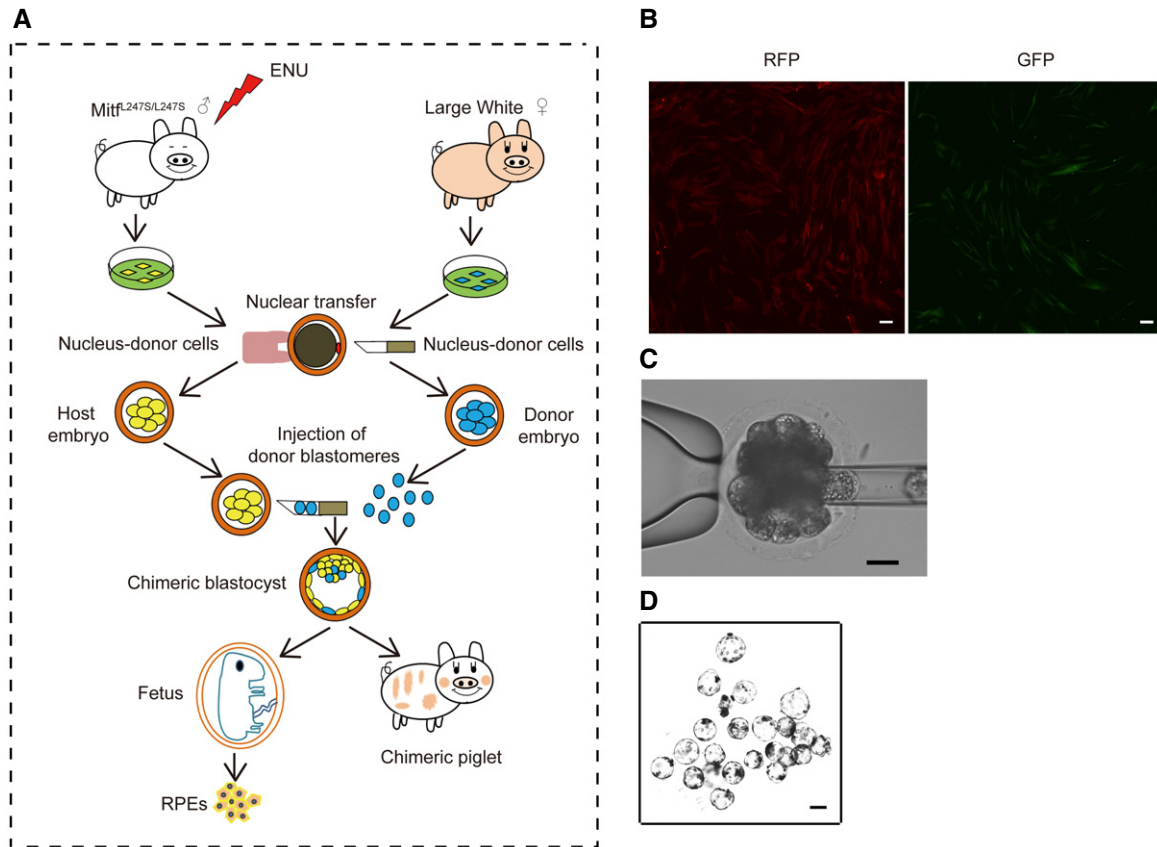

**Figure EV1. Generation of GFP- and RFP-labeled PEFs and chimeric porcine blastocysts.**

A Schematic procedures for the generation of chimeric fetuses and pigs.

B The PEFs were confirmed by expression of *GFP* and *RFP*, which were then used for SCNT. Scale bars, 100  $\mu$ m.

C Complementation of cloned host embryos, derived from the Bama RFP-labeled PEFs, with injection of donor blastomeres, derived from Bama GFP-labeled PEFs. Scale bar, 100  $\mu$ m.

D The chimeric blastocysts. Scale bar, 100  $\mu$ m.

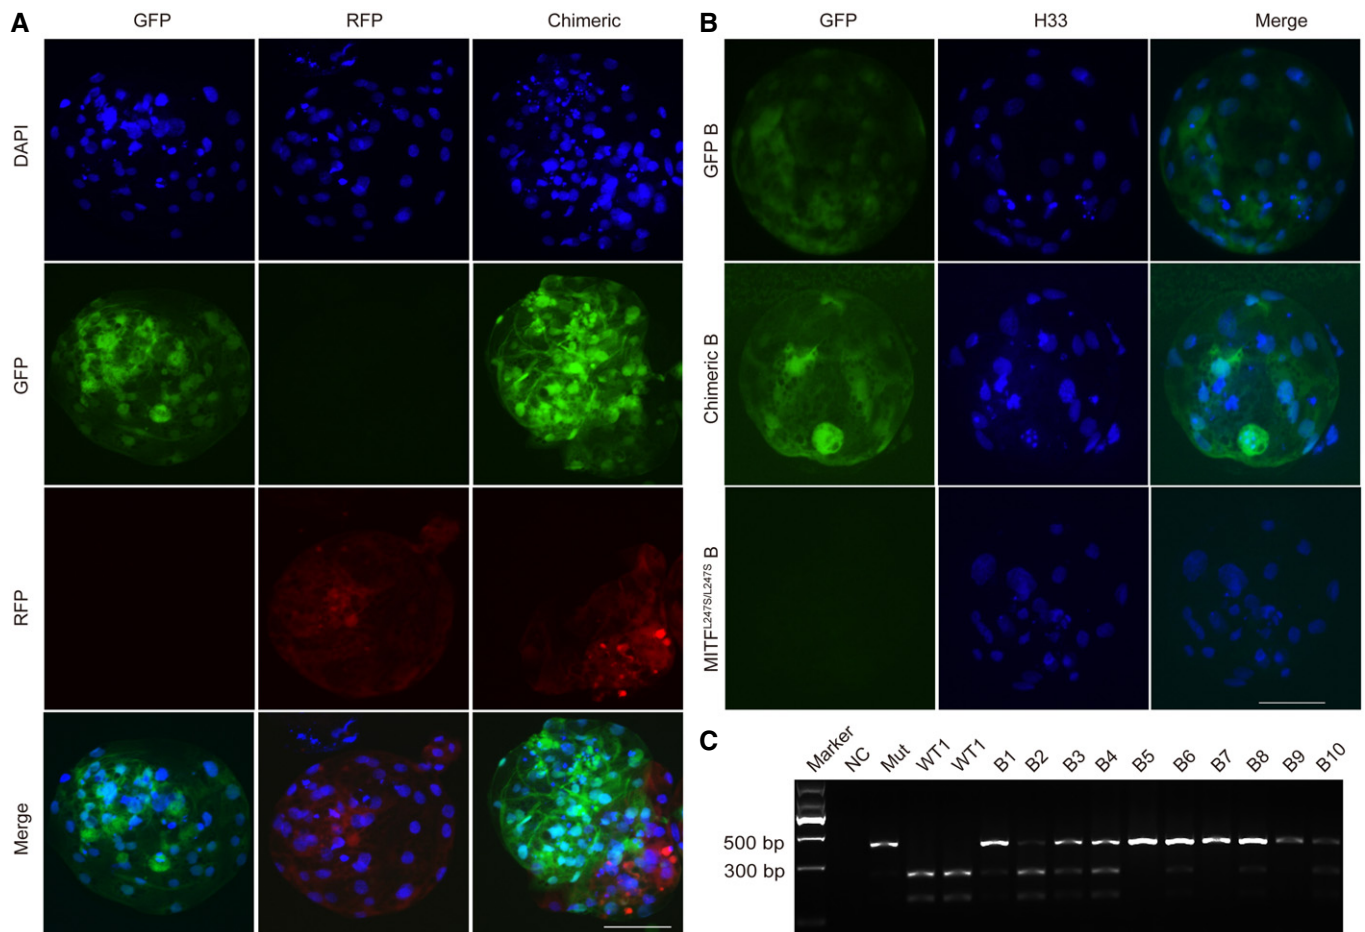

**Figure EV2. The chimeric contributions *in vitro* were detected by immunofluorescence and RFLP analysis simultaneously.**

- A Representative immunofluorescence images show the expression of *RFP* and *GFP* simultaneously in chimeric embryos. *GFP*-labeled and *RFP*-labeled blastocysts are shown as negative controls. Scale bar, 50  $\mu$ m.
- B Representative immunofluorescence images showed the expression of *GFP* in the chimeric blastocyst. Scale bar, 50  $\mu$ m.
- C Genotyping for porcine blastocysts derived from injected embryos. Porcine *MITF*-specific primers were used for the detection of chimeric contribution. Restriction enzymes *Dra*I was used for digestion of PCR products. NC, negative control with no genomic DNA loaded. Mut, Bama *MITF*<sup>L247S/L247S</sup> blastocyst DNA loaded. WT, Bama wild-type blastocyst DNA loaded. B1-B10, collected the injected blastocysts DNA loaded.

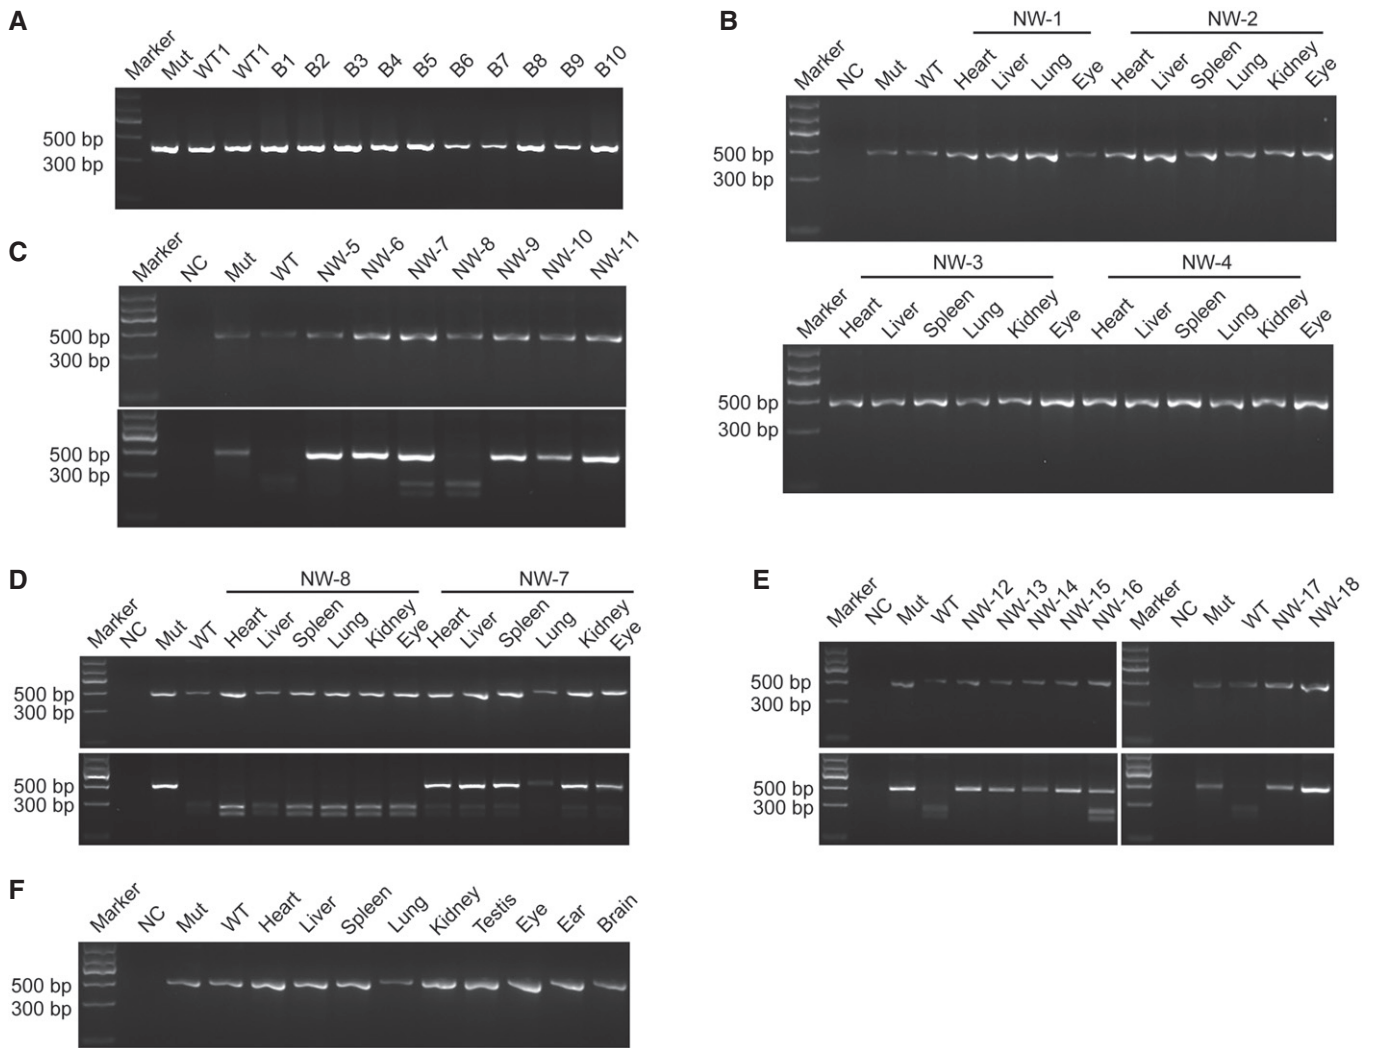

**Figure EV3. Genotyping for the chimeric contributions in fetuses and full-term chimeric pig.**

- A PCR amplification of *MITF* in the blastocysts. Mut, Bama *MITF*<sup>L247S/L247S</sup> blastocyst DNA loaded. WT1-WT2, DNA of Bama WT number 1 and 2 blastocysts loaded. B1-B10, DNA of the injected blastocysts from number 1 to number 10 loaded.
- B PCR amplification of *MITF* in the E44 fetuses. NC, negative control with no genomic DNA loaded. Mut, *MITF*<sup>L247S/L247S</sup> genomic DNA loaded. WT, LW genomic DNA loaded.
- C PCR amplification of *MITF* and PCR-RFLP analysis of *MITF* in E60 fetuses. NC, negative control with no genomic DNA loaded. Mut, *MITF*<sup>L247S/L247S</sup> genomic DNA loaded. WT, Bama genomic DNA loaded. NW-5-NW-11, fetuses at E60.
- D PCR amplification of *MITF* and digestion of the PCR products in the multiple organs of the NW-7 and NW-8 fetuses. NC, negative control with no genomic DNA loaded. Mut, *MITF*<sup>L247S/L247S</sup> genomic DNA loaded. WT, Bama genomic DNA loaded.
- E PCR amplification of *MITF* and PCR-RFLP analysis of *MITF* in the full-term chimeric pig. NC, negative control with no genomic DNA loaded. Mut, *MITF*<sup>L247S/L247S</sup> genomic DNA loaded. WT, Bama GFP-labeled genomic DNA loaded.
- F PCR amplification of *MITF* in multiple organs of the full-term chimeric pig. NC, negative control with no genomic DNA loaded. Mut, *MITF*<sup>L247S/L247S</sup> genomic DNA loaded. WT, Bama GFP-labeled genomic DNA loaded.

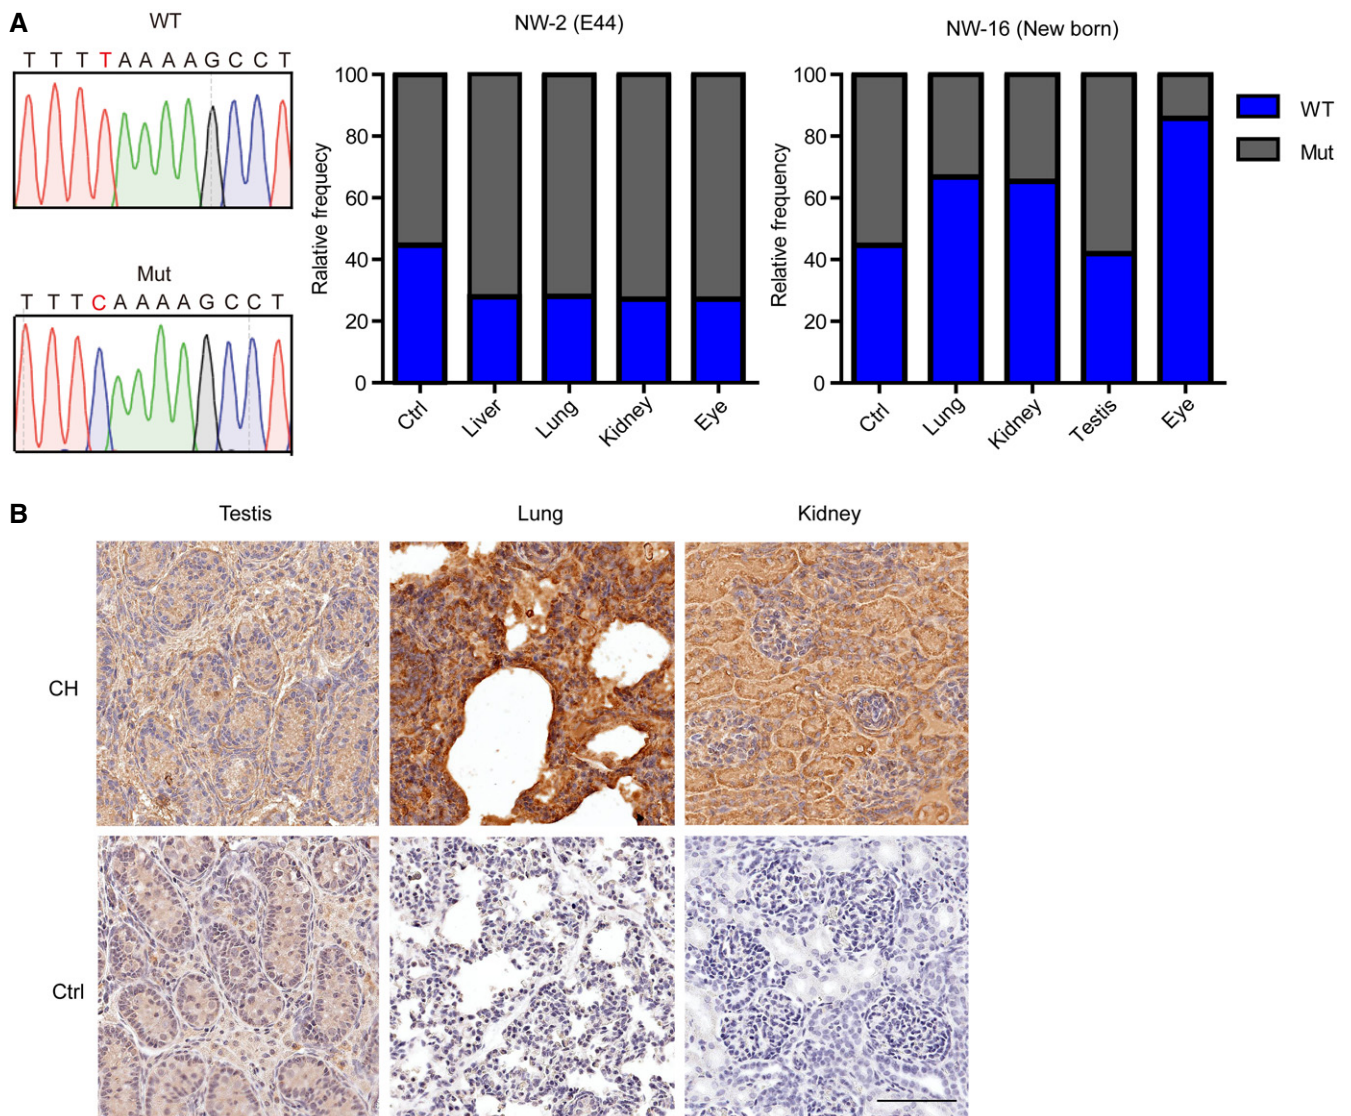

**Figure EV4. Identification of the chimeric contributions in tissues from E44 fetus and piglet NW-16.**

A Next-generation sequencing analysis of the origin of *MITF* in multiple tissues of E44 fetus and piglet NW-16. The PCR product of *MITF*<sup>+/L247S</sup> was as control. WT, *MITF*<sup>+/+</sup> allele. Mut, *MITF*<sup>L247S/L247S</sup> allele.

B The chimeric contributions were determined in the multiple tissues of the chimeric pig by immunohistochemistry analysis of *GFP*. Scale bar, 90  $\mu$ m.
