# Supplementary material for: Rescuing ocular development in an anophthalmic pig by blastocyst complementation
Source: PubMed Central journal article supplement (PMC6284517; doi:10.15252/emmm.201808861), 2018-11-16

Figure 2B

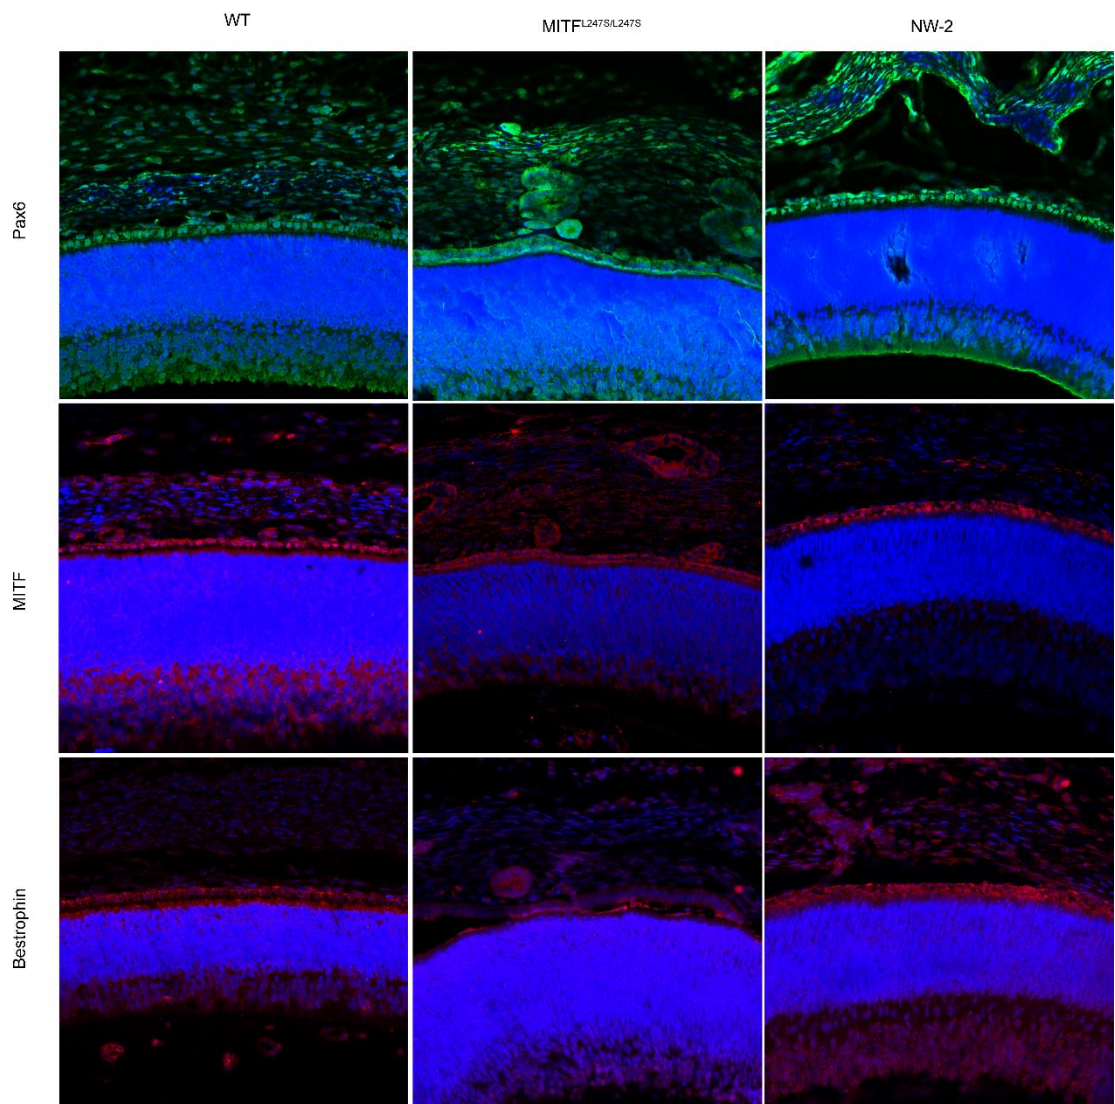

Supplement: EMMM-10-e8861-s004.pdf [file EMMM-10-e8861-s004.pdf]
